# Supplementary material for: High-efficiency oxygen evolution electrocatalysis enabled by Ar/O 2 plasma-induced synergistic modifications in NiFe Prussian blue analogue systems
Source: Royal Society of Chemistry journal article supplement (doi:10.1039/d5ra03979g), 2025-01-01
Supplement: d5ra03979g1.pdf [file d5ra03979g1.pdf]

# **High-Efficiency Oxygen Evolution Electrocatalysis Enabled by Ar/O<sub>2</sub> Plasma-Induced Synergistic Modifications in NiFe Prussian Blue Analogue Systems**

Yaoyao He<sup>a</sup>, Jin Fang<sup>a</sup>, Wenyuan Zhang<sup>a</sup>, Nnditshedzeni Eric Maluta<sup>b</sup>, Fhulufhelo

Nemangwele<sup>a,b</sup>, Li Zhang<sup>a</sup>, Hui Lv<sup>a,c</sup>, Pei Hu<sup>a</sup> and Zhuo Peng<sup>a\*</sup>

<sup>a</sup> China-South Africa PV-Hydrogen Energy Joint Research Center, School of Science, Hubei University of Technology (HBUT), Wuhan 430068, China.

<sup>b</sup> Department of Physics, University of Venda, Thohoyandou 0950, South Africa.

<sup>c</sup> School of Physics and Electromechanical Engineering, Hubei University of Education, Wuhan 430068, China.

## Experimental Section

All chemical reagents were purchased from Sinopharm Group and used directly without purification. The nickel foam is cut into 2cm\*3cm size and the surface is rinsed with anhydrous ethanol to rinse oil and other impurities. Next, the nickel foam was immersed in a 1M HCl solution for 10 minutes to remove nickel oxide impurities from the surface. The nickel foam was then rinsed sequentially using deionized water and anhydrous ethanol to ensure that residual HCl was thoroughly removed. Finally, the treated nickel foam was stored in anhydrous ethanol for subsequent use.

### Synthesis of the catalysts

Add 0.01 mol ( $K_3[Fe(CN)_6]$ ) potassium ferricyanide to 50 mL of hydrochloric acid solution with a concentration of 0.2 M and magnetically stir at room temperature until complete dissolution to form a clarified solution. The pretreated nickel foam was immersed into the above solution and allowed to stand at room temperature for 12 h. The nickel foam was then taken off and washed several times with ultrapure water and anhydrous ethanol to remove the unreacted residues on the surface, and placed in an oven to dry overnight, and the resulting product was labeled as NiFe PBA.

The processed nickel foam is placed into the reactive ion etching machine (Tailong Electronics, RIE-150). When the vacuum reaches  $10^{-4}$  Torr, gases are introduced to commence the etching experiment. The argon gas flow rate is 100 cc, the oxygen gas flow rate is 10 cc, and the power is set to 90 W. The front and back sides were treated for five minutes, and the MOF catalyst material containing Ni-Fe oxides was obtained after the etching was completed, which is labeled herein as NiFe PBA-Ar/O<sub>2</sub>. The labeling methods of other samples were differentiated by the differences in process treatments. In addition, the sample treated only by argon is labeled as NiFe PBA-Ar; the sample treated only by oxygen is labeled as NiFe PBA-O<sub>2</sub> (oxygen gas flow rate is 100 cc).

The loading amounts of the various catalysts were calculated using the weighing method and were determined to be 1.67 mg/cm<sup>2</sup> (NiFe PBA), 1.53 mg/cm<sup>2</sup> (NiFe PBA-Ar), 1.48 mg/cm<sup>2</sup> (NiFe PBA-Ar/O<sub>2</sub>), and 1.65 mg/cm<sup>2</sup> (NiFe PBA-O<sub>2</sub>), respectively.

### Material characterization

The microstructures of all samples were characterized via Field-emission scanning electron microscopy (FESEM, Nova Nano SEM 450) and transmission electron microscopy (TEM, Tecnai G2 F30). X-ray diffraction (XRD, X'Pert PRO diffractometer) was employed to investigate the crystallographic structure with Cu K $\alpha$  radiation ( $\lambda=1.5418$  Å). The surface chemical environment was tested by X-ray photoelectron spectroscopy (XPS, AXIS-ULTRA DLD-600W). The in-situ Raman spectra was analyzed by a confocal Raman microscope (Horiba XploRA plus).

### Electrochemical measurement

The electrodes were fully characterized using a CorrTest electrochemical workstation, covering a variety of techniques such as linear scanning voltammetry (LSV), Tafel curve analysis, electrochemical impedance spectroscopy (EIS), and timed current testing. All experiments were based on a three-electrode system in an alkaline environment (1 M KOH), where the foam nickel catalyst is cut into 2\*1 cm<sup>2</sup> pieces, clamped with an electrode holder, exposing only a 1\*1 cm<sup>2</sup> area to serve as the working electrode. and the reference electrode

was Hg/HgO. During the experiments, the potential of the working electrode needed to be converted to reversible hydrogen electrode potential (RHE), which was calculated as follows:

$$RHE = E_{(SCE)} + 0.0592 \times \text{pH} + 0.098 \quad (1)$$

Linear Scanning Voltammetry (LSV) is used to obtain a linear scanning voltammetric curve by applying a potential with a constant rate of change to the working electrode and measuring its effect on the current density. Specific parameters include: OER test range of 1.1 to 1.8 V and a scan rate of 5 mV/s. The slope of the Tafel curve reflects the catalyst activity and the curve is able to respond to the relationship between the steady-state current density and overpotential, and the Tafel equation is expressed as:

$$\eta = a + b \times \log|j| \quad (2)$$

where  $\eta$  denotes the overpotential,  $a$  and  $b$  are Fennel's constants, and  $j$  represents the current density. The linear region was selected within the kinetically controlled regime of 1.54-1.60 V vs. RHE, which corresponds to an overpotential ( $\eta$ ) range of 310–370 mV (OER onset potential: ~1.23 V vs. RHE). This window avoids: low-potential non-faradaic currents and high-potential diffusion limitations. The AC amplitude for the EIS test was set to 5 mV with a frequency range from 100 kHz to 0.01 Hz. The voltage-to-current ratio of the AC signals was measured by applying a series of small amplitude AC signals of different frequencies to the system. EIS was fitted using Zview software to obtain solution resistance ( $R_s$ ) and charge transfer resistance ( $R_{ct}$ ) through a single-capacitance equivalent circuit. All polarization curves were calibrated by IR drop compensation method to eliminate the effect of solution resistance  $R_s$ . The stability of the catalyst is tested using a constant current protocol.

**In situ Raman spectra tests:** A photograph of in situ Raman setup was shown in Figure. S1. An electrolytic cell with three electrode configuration was used for the electrochemical test. A 15\*15 mm sample was used as working electrode, a Pt wire and Ag/AgCl (saturated KCl) electrodes were used as counter and reference electrode, respectively. During Raman test, 1 M KOH solution was continuously fed into the electrolytic cell at a rate of 10 ml/min. Raman spectra was collected in the range of 200 to 2000  $\text{cm}^{-1}$  using a 638-nm laser.

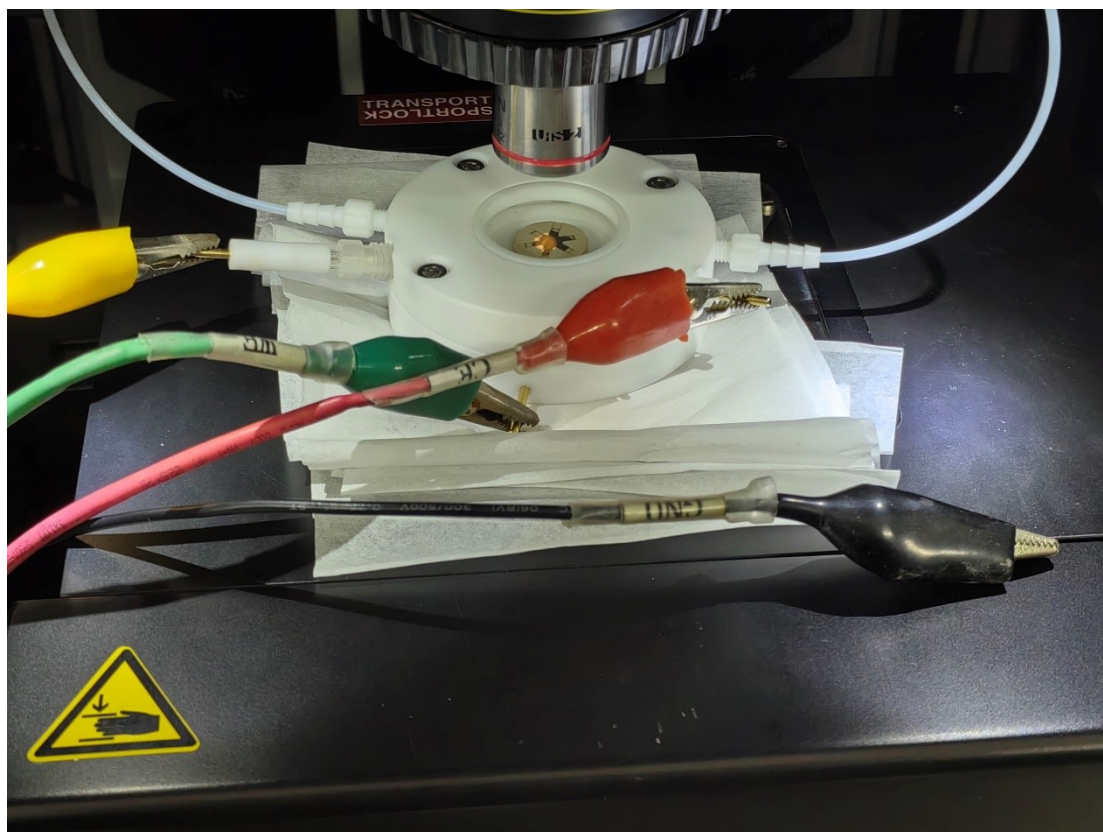

Figure S1. Photo of the electrochemical in situ Raman testing cell

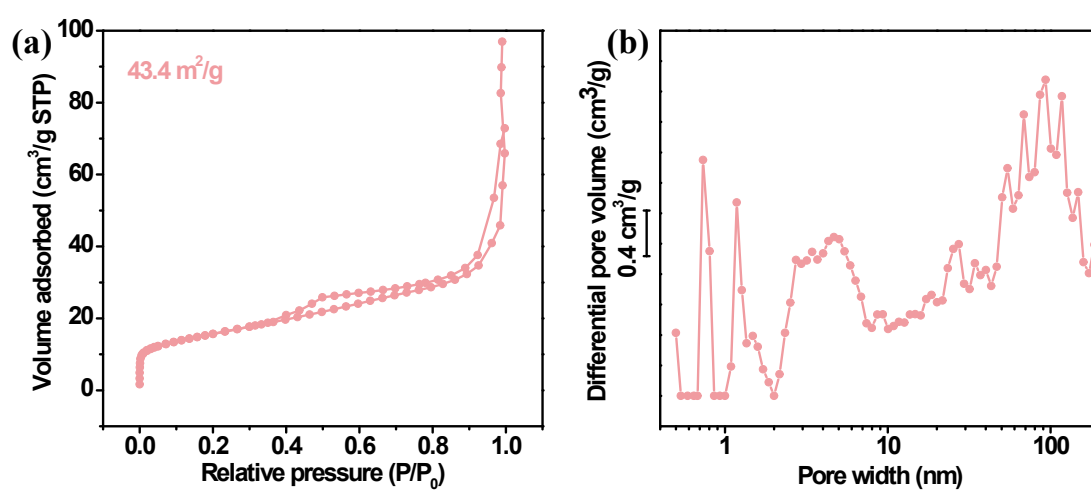

Figure S2. (a) N<sub>2</sub> isothermal adsorption curve (at 77 K) and BJH pore size distribution

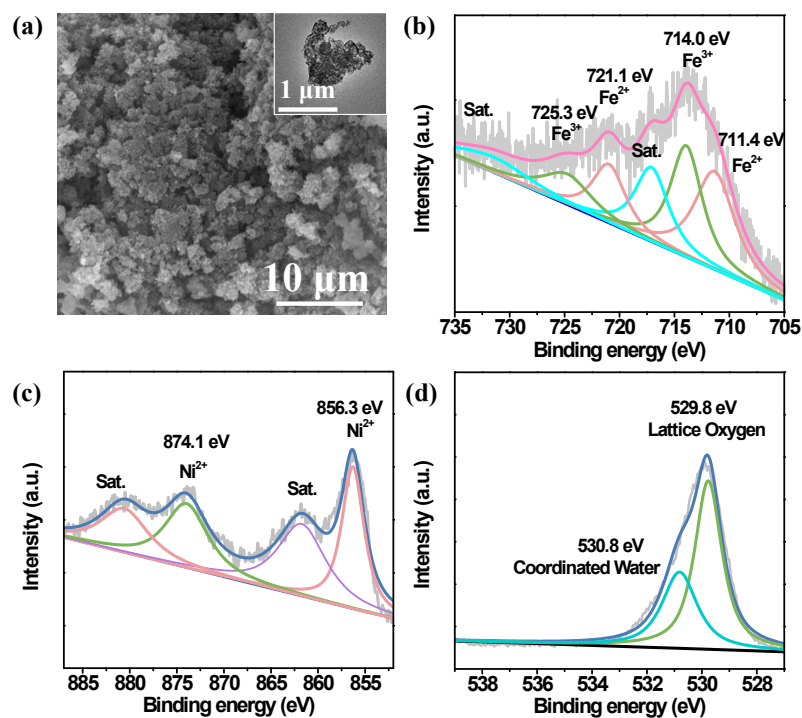

Figure S3. SEM and TEM(the upper right corner) image of NiFe PBA-O<sub>2</sub> (a); fine spectra of Fe 2p (b), Ni 2p (c), and O 1s (d)

XPS in NiFe PBA-O<sub>2</sub>

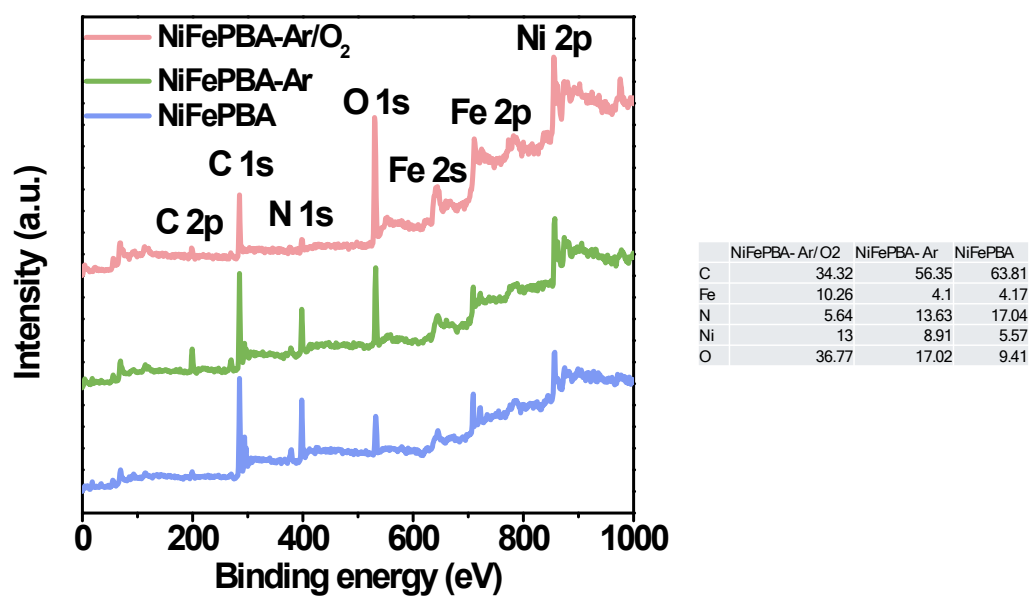

Figure S4. XPS survey spectra of NiFe PBA-Ar and NiFe PBA-Ar/O<sub>2</sub>

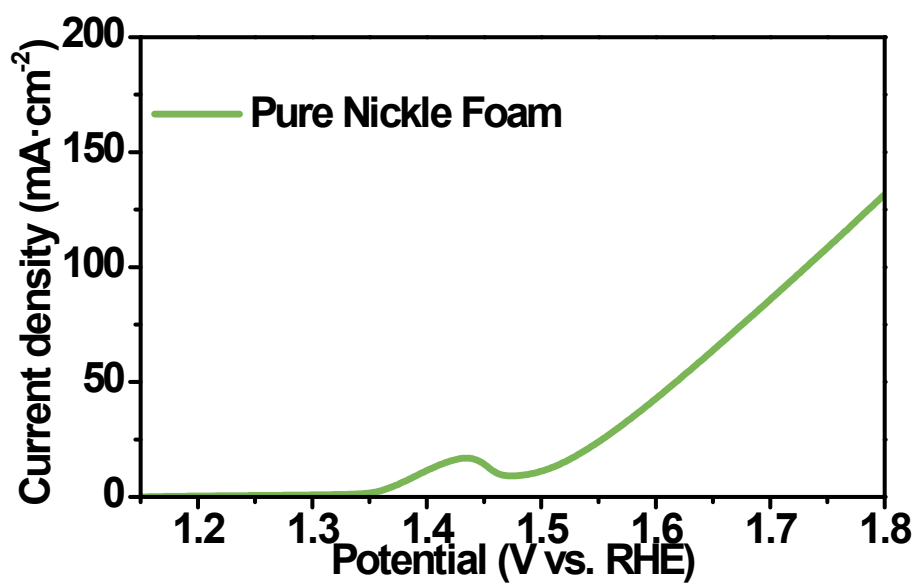

Figure S5. LSV curves of pure nickel foam

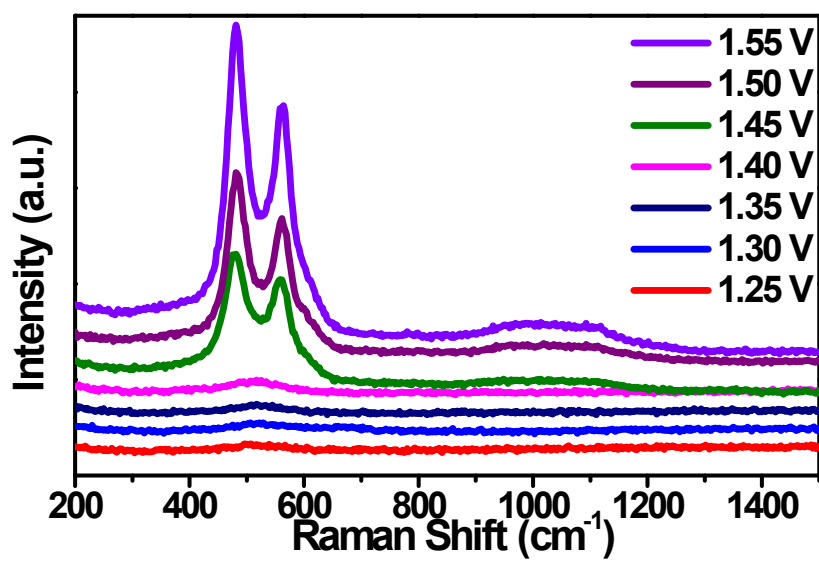

Figure S6. In-situ Raman Spectroscopy Curves of NiFe PBA-Ar/O<sub>2</sub> during Electrochemical Process

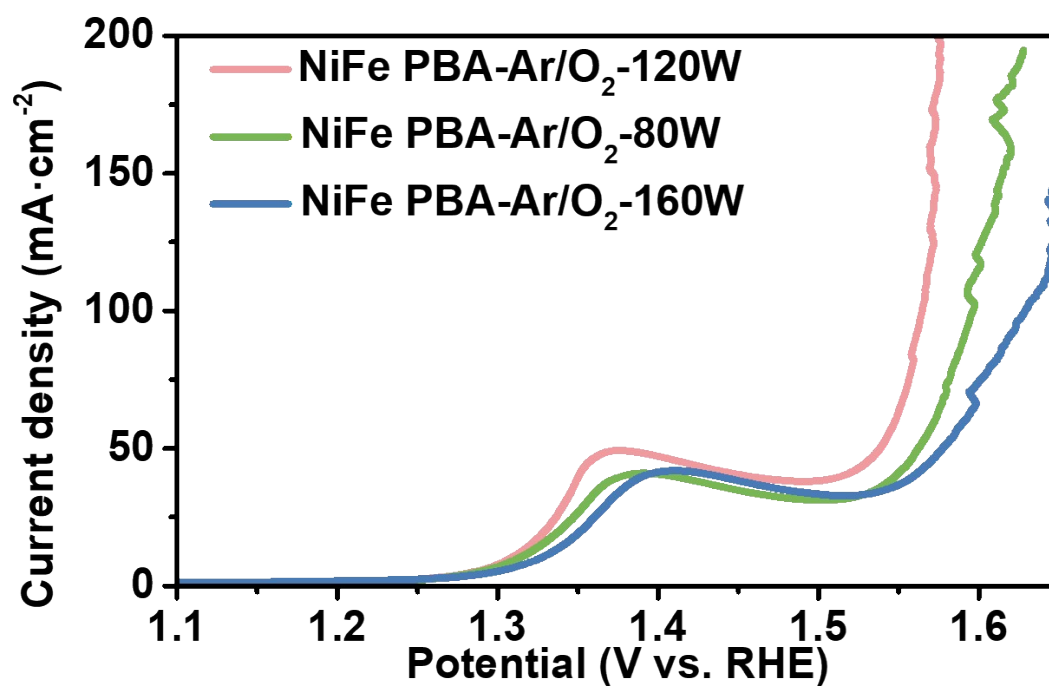

Figure S7. LSV curves in 1.0 M KOH solution of NiFe PBA-Ar and NiFe PBA-Ar/O<sub>2</sub>

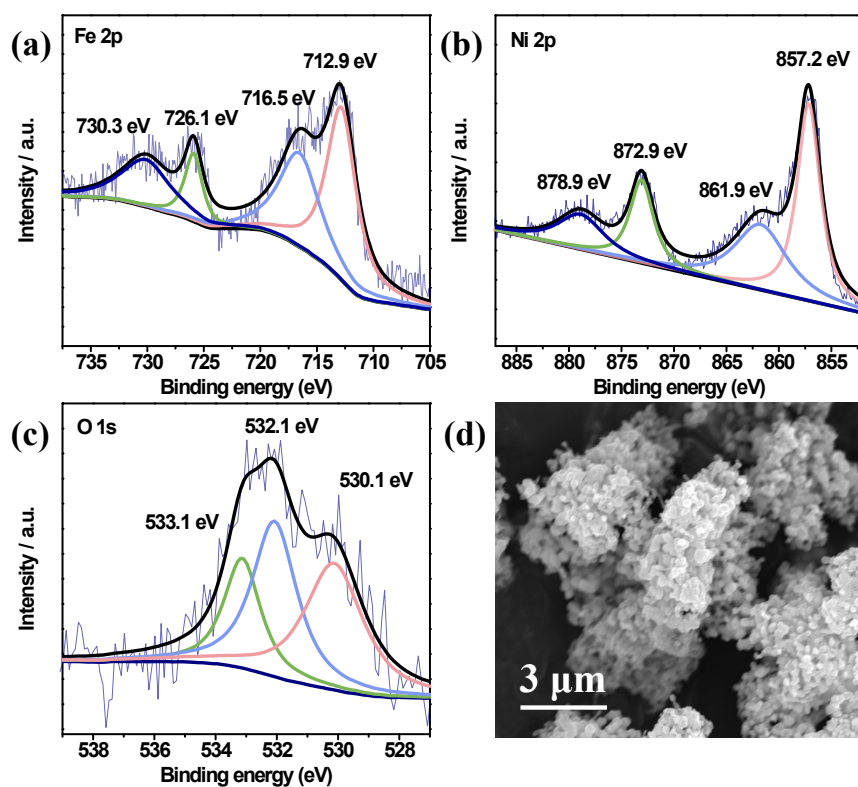

Figure S8. Post-stability XPS analysis(a)-(c) of NiFe PBA-Ar/O<sub>2</sub>; Post-stability SEM image of NiFe PBA-Ar/O<sub>2</sub>

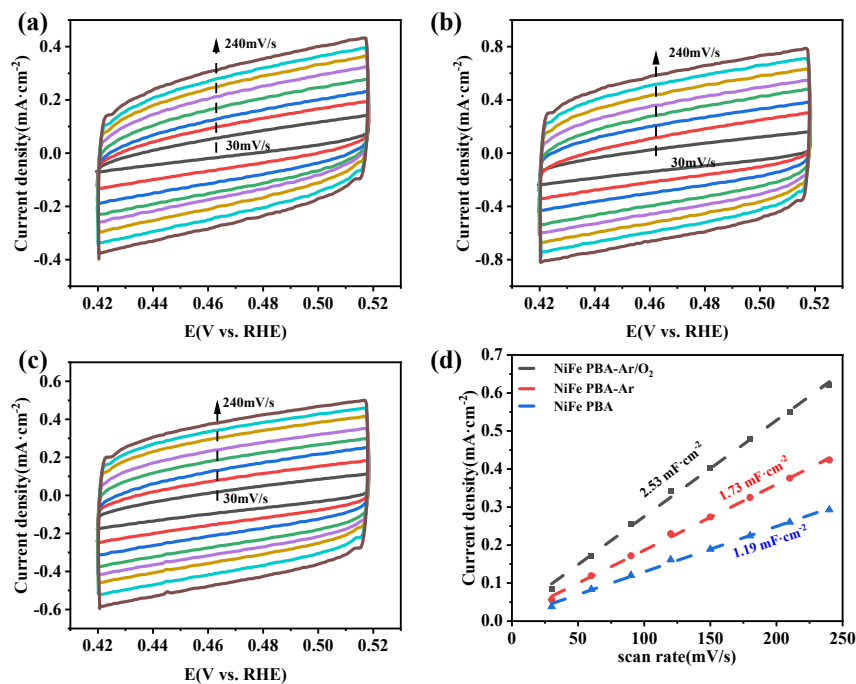

Figure S9. CV curves of NiFe PBA (a), NiFe PBA-Ar/O<sub>2</sub> (b) and NiFe PBA-Ar (c); C<sub>dl</sub> of samples (d)

Table S1. Atomic Ratio of Elements Obtained from XPS Analysis

|    | NiFe PBA-Ar/O <sub>2</sub> | NiFe PBA-Ar | NiFe PBA |
|----|----------------------------|-------------|----------|
| C  | 34.32                      | 56.35       | 63.81    |
| Fe | 10.26                      | 4.1         | 4.17     |
| N  | 5.64                       | 13.63       | 17.04    |
| Ni | 13                         | 8.91        | 5.57     |
| O  | 36.77                      | 17.02       | 9.41     |

Table S2. Comparison of Oxygen Evolution Electrocatalytic Activity between NiFe-based Catalysts in Literature and Catalysts in This Work

|                                           | Environment | $j/(\text{mA cm}^{-2})$ | $\eta / \text{mV}$ | Refs                                              |
|-------------------------------------------|-------------|-------------------------|--------------------|---------------------------------------------------|
| Ni <sub>1-x</sub> Fe <sub>x</sub> OOH-LDH | 1 M KOH     | 100                     | 410                | <i>Materials Today Advances</i> .2025, 25, 100560 |



|                                                                          |                                      |     |     |                                                                         |
|--------------------------------------------------------------------------|--------------------------------------|-----|-----|-------------------------------------------------------------------------|
| A-NiFeV/NF                                                               | 1 M KOH                              | 100 | 313 | Journal of Colloid and Interface Science, 2024, 653, 721-729            |
| Fe-MoVNi                                                                 | 1 M KOH                              | 100 | 374 | <i>Molecular Catalysis</i> , 2023, 542, 113132                          |
| NiFe@C 5:3                                                               | 1 M KOH                              | 100 | 438 | <i>International Journal of Hydrogen Energy</i> , 2022, 47, 18955-18962 |
| NiFe LDH 4:1                                                             | 1 M KOH                              | 100 | 332 | <i>Materials Today Sustainability</i> , 2025, 31, 101130                |
| NiFeF <sub>5</sub>                                                       | 1 M KOH                              | 100 | 349 | <i>ChemPhysChem</i> , 2025, 26, e202400701.                             |
| HP Ni-P                                                                  | 1 M KOH                              | 100 | 331 | <i>ECS Meeting Abstracts</i> . 2020, 1, 1583.                           |
| Fe-N-C/<br>Ni <sub>0.75</sub> Fe <sub>0.25</sub>                         | 1 M KOH                              | 100 | 312 | <i>Electrochimica Acta</i> ., 2018, 281, 684-691.                       |
| Ni <sub>0.1</sub> Co <sub>0.9</sub> -MOF                                 | 1 M KOH                              | 100 | 384 | <i>Journal of Alloys and Compounds</i> , 2023, 947 169498.              |
| Ni-Mn-Co-Fe                                                              | 1 M KOH                              | 100 | 447 | <i>Renewable Energy</i> . 2024, 237, 121688.                            |
| NiMnFe-ex                                                                | 1 M KOH                              | 100 | 321 | <i>Electrocatalysis</i> . 2025, 1868-5994                               |
| Ni-Mo-Fe                                                                 | 1 M KOH                              | 100 | 408 | <i>International Journal of Hydrogen Energy</i> . 2021, 46, 3821-3822.  |
| V <sub>0.03</sub> Fe-Ni <sub>3</sub> S <sub>2</sub> /Ni(OH) <sub>2</sub> | 1 M KOH                              | 100 | 385 | <i>Surfaces and Interfaces</i> . 2025, 58, 105864.                      |
| N-NiFeSe <sub>2</sub>                                                    | 0.5 M H <sub>2</sub> SO <sub>4</sub> | 100 | 332 | <i>Electrochem. Commun</i> . 2021, 131, 107118.                         |
| NiFeO <sub>x</sub> H <sub>y</sub> -HS                                    | 1 M KOH                              | 100 | 305 | <i>J. Mater. Sci</i> . 2020, 55, 15140.                                 |
| Fe <sub>2</sub> Ni <sub>5</sub> -T175                                    | 1 M KOH                              | 20  | 262 | <i>Fuel</i> 400 (2025) 135730                                           |
| MNFO-V <sub>O</sub>                                                      | 1 M KOH                              | 100 | 390 | <i>International Journal of Hydrogen Energy</i> 137                     |

|                                                                    |                |            |            |                                  |
|--------------------------------------------------------------------|----------------|------------|------------|----------------------------------|
|                                                                    |                |            |            | (2025) 73–82                     |
|                                                                    |                |            |            | <i>Journal of Colloid and</i>    |
|                                                                    |                |            |            | <i>Interface Science</i> 691     |
|                                                                    |                |            |            | (2025) 137411                    |
|                                                                    |                |            |            | <i>Materials Today</i>           |
|                                                                    |                |            |            | <i>Chemistry</i> 47 (2025)       |
|                                                                    |                |            |            | 102840                           |
|                                                                    |                |            |            | <i>Journal of the American</i>   |
|                                                                    |                |            |            | <i>Chemical Society</i> . 2024,  |
|                                                                    |                |            |            | 146, 12548-12556                 |
|                                                                    |                |            |            | <i>Nano Research</i> . 2024, 17, |
|                                                                    |                |            |            | 6646                             |
| Nd <sub>0.1</sub> Ni <sub>0.9</sub> Co <sub>2</sub> O <sub>4</sub> | 1 M KOH        | 100        | 520        |                                  |
| Co-<br>NiFe <sub>2</sub> O <sub>4</sub> /NiTe <sub>2</sub>         | 1 M KOH        | 10         | 225        |                                  |
| NiFeP                                                              | 1 M KOH        | 10         | 210        |                                  |
| NiFe-LDH/<br>NiFe <sub>2</sub> O <sub>4</sub> / NiFe-<br>LDH       | 1 M KOH        | 100        | 390        |                                  |
| <b>NiFe PBA-<br/>Ar/O<sub>2</sub></b>                              | <b>1 M KOH</b> | <b>100</b> | <b>334</b> | <b>This work</b>                 |
